# Supplementary material for: Ticks and Tick-Borne Pathogens in Recreational Greenspaces in North Central Florida, USA
Source: MDPI journal article supplement (doi:10.3390/microorganisms11030756), 2023-03-15
Supplement: s1 [file s1]

## **Supplementary Materials**

**Supplementary Table S1.** Reclassification of Florida Land Cover Classification System. The Class ID and Class were obtained from the original Florida Land Cover Classification System (2018). Reclass and Reclass ID represent the land cover reclassification used for this study. In this reclassification, forest refers to any upland habitat that is not urbanized. In addition to canopied habitats, this classification can include sinkholes forested lots in otherwise urban landscapes, and pastures but agricultural land like row crops were separately classified.

| Class ID | Class                        | Reclass     | Reclass ID |
|----------|------------------------------|-------------|------------|
| 1110     | Upland Hardwood Forest       | Forest      | 2          |
| 1120     | Mesic Hammock                | Forest      | 2          |
| 1123     | Live Oak                     | Forest      | 2          |
| 1124     | Pine - Mesic Oak             | Forest      | 2          |
| 1150     | Xeric Hammock                | Forest      | 2          |
| 1210     | Scrub                        | Forest      | 2          |
| 1214     | Coastal Scrub                | Forest      | 2          |
| 1220     | Upland Mixed Woodland        | Forest      | 2          |
| 1230     | Upland Coniferous            | Forest      | 2          |
| 1231     | Upland Pine                  | Forest      | 2          |
| 1240     | Sandhill                     | Forest      | 2          |
| 1311     | Mesic Flatwoods              | Forest      | 2          |
| 1312     | Scrubby Flatwoods            | Forest      | 2          |
| 1400     | Mixed Hardwood-Coniferous    | Forest      | 2          |
| 1410     | Successional Hardwood Forest | Forest      | 2          |
| 1500     | Shrub and Brushland          | Forest      | 2          |
| 1710     | Sinkhole                     | Forest      | 2          |
| 1730     | Limestone Outcrop            | Forest      | 2          |
| 1800     | Cultural - Terrestrial       | Lawn        | 3          |
| 1810     | Mowed Grass                  | Lawn        | 3          |
| 1821     | Low Intensity Urban          | Residential | 4          |
| 1822     | High Intensity Urban         | Residential | 4          |
| 1831     | Rural Open                   | Forest      | 2          |
| 1832     | Rural Structures             | Residential | 4          |
| 1840     | Transportation               | Commercial  | 1          |
| 1841     | Roads                        | Commercial  | 1          |
| 1850     | Communication                | Commercial  | 1          |
| 1860     | Utilities                    | Commercial  | 1          |
| 1870     | Extractive                   | Commercial  | 1          |
| 1872     | Sand & Gravel Pits           | Commercial  | 1          |

|       |                                      |            |   |
|-------|--------------------------------------|------------|---|
| 1873  | Rock Quarries                        | Commercial | 1 |
| 1877  | Spoil Area                           | Commercial | 1 |
| 1880  | Bare Soil/Clear Cut                  | Commercial | 1 |
| 2111  | Wet Prairie                          | Wetland    | 6 |
| 2112  | Mixed Scrub-Shrub Wetland            | Wetland    | 6 |
| 2120  | Marshes                              | Wetland    | 6 |
| 2121  | Isolated Freshwater Marsh            | Wetland    | 6 |
| 2140  | Floating/Emergent Aquatic Vegetation | Wetland    | 6 |
| 2211  | Cypress                              | Wetland    | 6 |
| 2215  | Floodplain Swamp                     | Wetland    | 6 |
| 2220  | Other Coniferous Wetlands            | Wetland    | 6 |
| 2221  | Wet Flatwoods                        | Wetland    | 6 |
| 2231  | Baygall                              | Wetland    | 6 |
| 2232  | Hydric Hammock                       | Wetland    | 6 |
| 2233  | Mixed Wetland Hardwoods              | Wetland    | 6 |
| 2240  | Mixed Hardwood Coniferous Swamps     | Wetland    | 6 |
| 2440  | Clearcut Wetland                     | Wetland    | 6 |
| 3000  | Lacustrine                           | Water      | 5 |
| 3100  | Natural Lakes and Ponds              | Water      | 5 |
| 3111  | Clastic Upland Lake                  | Water      | 5 |
| 3113  | Flatwoods/Prairie/Marsh Lake         | Water      | 5 |
| 3114  | River Floodplain Lake/Swamp Lake     | Water      | 5 |
| 3115  | Sinkhole Lake                        | Water      | 5 |
| 3117  | Sandhill Lake                        | Water      | 5 |
| 3200  | Cultural - Lacustrine                | Water      | 5 |
| 3210  | Artificial/Farm Pond                 | Water      | 5 |
| 3211  | Aquacultural Ponds                   | Water      | 5 |
| 3220  | Artificial Impoundment/Reservoir     | Water      | 5 |
| 3230  | Quarry Pond                          | Water      | 5 |
| 3240  | Sewage Treatment Pond                | Water      | 5 |
| 3250  | Stormwater Treatment Areas           | Water      | 5 |
| 3260  | Industrial Cooling Pond              | Water      | 5 |
| 4000  | Riverine                             | Water      | 5 |
| 4100  | Natural Rivers and Streams           | Water      | 5 |
| 4120  | Blackwater Stream                    | Water      | 5 |
| 4130  | Spring-run Stream                    | Water      | 5 |
| 4140  | Seepage Stream                       | Water      | 5 |
| 4220  | Ditch/Artificial Intermittent Stream | Water      | 5 |
| 18211 | Urban Open Land                      | Forest     | 2 |

|         |                                                   |             |   |
|---------|---------------------------------------------------|-------------|---|
| 18212   | Residential, Low Density                          | Residential | 4 |
| 18213   | Grass                                             | Lawn        | 3 |
| 18221   | Residential, Med. Density - 2-5 Dwelling Units/AC | Residential | 4 |
| 18222   | Residential, High Density > 5 Dwelling Units/AC   | Residential | 4 |
| 18223   | Commercial and Services                           | Commercial  | 1 |
| 18224   | Industrial                                        | Commercial  | 1 |
| 18225   | Institutional                                     | Commercial  | 1 |
| 18311   | Rural Open Forested                               | Forest      | 2 |
| 18312   | Rural Open Pine                                   | Forest      | 2 |
| 18332   | Orchards/Groves                                   | Agriculture | 0 |
| 18334   | Vineyard and Nurseries                            | Agriculture | 0 |
| 21211   | Depression Marsh                                  | Wetland     | 6 |
| 21212   | Basin Marsh                                       | Wetland     | 6 |
| 22131   | Dome Swamp                                        | Wetland     | 6 |
| 22132   | Basin Swamp                                       | Wetland     | 6 |
| 22211   | Hydric Pine Flatwoods                             | Wetland     | 6 |
| 22311   | Bay Swamp                                         | Wetland     | 6 |
| 22323   | Cabbage Palm Hammock                              | Wetland     | 6 |
| 22331   | Bottomland Forest                                 | Wetland     | 6 |
| 182111  | Urban Open Forested                               | Forest      | 2 |
| 182112  | Urban Open Pine                                   | Forest      | 2 |
| 182131  | Parks and Zoos                                    | Lawn        | 3 |
| 182132  | Golf courses                                      | Lawn        | 3 |
| 182133  | Ballfields                                        | Lawn        | 3 |
| 182134  | Cemeteries                                        | Lawn        | 3 |
| 182135  | Community rec. facilities                         | Lawn        | 3 |
| 183311  | Row Crops                                         | Agriculture | 0 |
| 183312  | Field Crops                                       | Agriculture | 0 |
| 183313  | Improved Pasture                                  | Agriculture | 0 |
| 183314  | Unimproved/Woodland Pasture                       | Forest      | 2 |
| 183321  | Citrus                                            | Agriculture | 0 |
| 183323  | Pecan                                             | Agriculture | 0 |
| 183332  | Coniferous Plantations                            | Forest      | 2 |
| 183341  | Tree Nurseries                                    | Agriculture | 0 |
| 183343  | Ornamentals                                       | Agriculture | 0 |
| 183351  | Feeding Operations                                | Agriculture | 0 |
| 183352  | Specialty Farms                                   | Agriculture | 0 |
| 221312  | Gum Pond                                          | Wetland     | 6 |
| 1833111 | Irrigated Cropland                                | Agriculture | 0 |

|         |                           |             |   |
|---------|---------------------------|-------------|---|
| 1833151 | Fallow Cropland           | Agriculture | 0 |
| 1833321 | Wet Coniferous Plantation | Forest      | 2 |

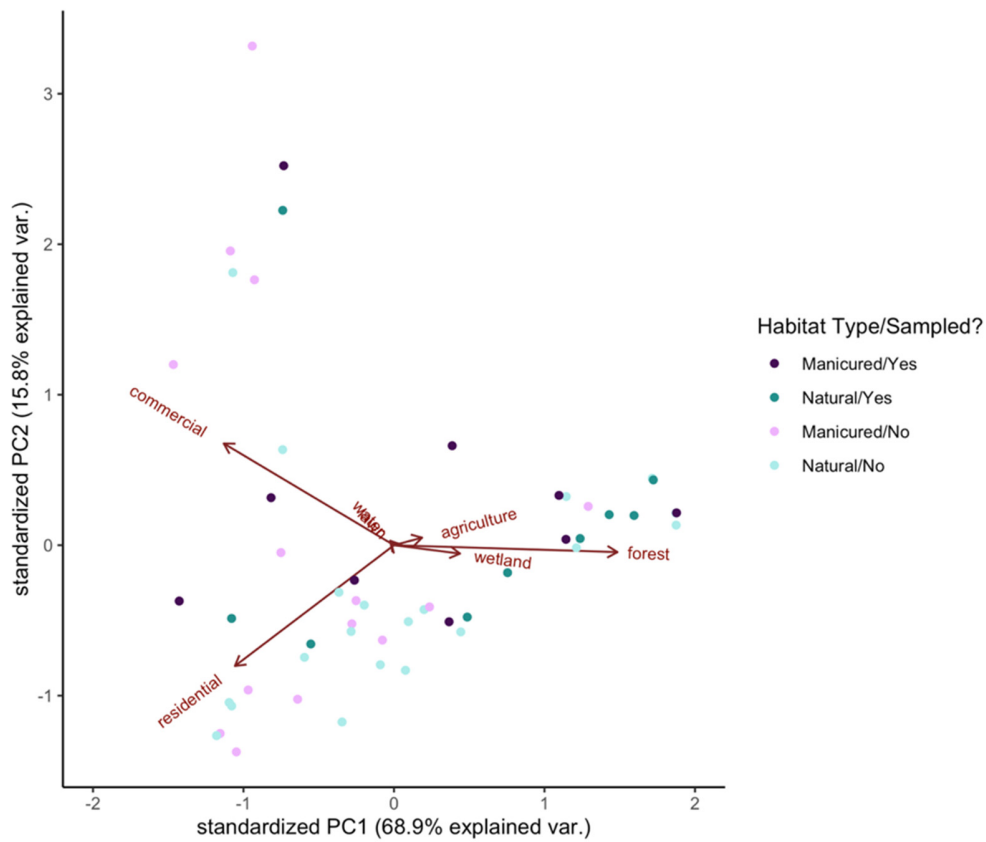

**Supplementary Figure S1.** PCA biplot of all sampling sites considered in this study. PC1, which represents nearly 70% of variation in landcover composition surrounding sites using a 1km buffer, represents a developed (negative PC1 values) to undeveloped (positive values of PC1) gradient. Sites sampled in this study are represented in dark purple and dark green.

**Supplemental Table S2.** List of recreational greenspaces sampled in Alachua County, Florida with sampling site habitat type designation (natural or manicured), number of ticks collected, species of ticks identified, and microorganisms present at each site.

| Greenspace                        | Internal Sampling site habitat designation | Managed by                                                                                               | N number of ticks (adults, nymphs) collected | Species of tick collected                                                    | Larvae Collected (Yes/No) (n = # of Pools) | Microorganisms present by genus or species if of medical/veterinary importance                                                                                                                                                                                                                                                                                                                                                                      |
|-----------------------------------|--------------------------------------------|----------------------------------------------------------------------------------------------------------|----------------------------------------------|------------------------------------------------------------------------------|--------------------------------------------|-----------------------------------------------------------------------------------------------------------------------------------------------------------------------------------------------------------------------------------------------------------------------------------------------------------------------------------------------------------------------------------------------------------------------------------------------------|
| Harmonic Woods                    | Natural                                    | The University of Florida                                                                                | 2                                            | <i>A. americanum</i> ,<br><i>I. scapularis</i>                               | No                                         | <i>None</i><br><i>None</i>                                                                                                                                                                                                                                                                                                                                                                                                                          |
| 29 <sup>th</sup> Road Nature Park | Natural                                    | City of Gainesville Parks, Recreation, & Cultural Affairs                                                | 7                                            | <i>A. americanum</i> ,<br><i>H. leporispalustris</i>                         | No                                         | <i>Rickettsia amblyommatis</i><br><i>None</i>                                                                                                                                                                                                                                                                                                                                                                                                       |
| John Mahon Nature Park            | Natural                                    | City of Gainesville Parks, Recreation, & Cultural Affairs                                                | 4                                            | <i>A. americanum</i> ,<br><i>I. scapularis</i>                               | No                                         | <i>Rickettsia amblyommatis</i><br><i>Ehrlichia Panola Mountain</i><br><i>Rickettsia sp. endosymbiont I. scap</i>                                                                                                                                                                                                                                                                                                                                    |
| Sweetwater Preserve               | Natural                                    | Alachua County Environmental Protection Department, Office of Conservation Lands, Alachua County Forever | 75                                           | <i>A. americanum</i> ,<br><i>I. scapularis</i>                               | No                                         | <i>Rickettsia amblyommatis</i><br><i>Babesia sp.</i><br><i>Babesia sp. (Coco)</i><br><i>Ehrlichia sp. Panola Mountain</i><br><i>Babesia odocoilei</i><br><i>Rickettsia sp. endosymbiont I. scap</i>                                                                                                                                                                                                                                                 |
| Split Rock Conservation Area      | Natural                                    | City of Gainesville Parks, Recreation, & Cultural Affairs                                                | 440                                          | <i>A. americanum</i> ,<br><br><i>D. variabilis</i> ,<br><i>I. scapularis</i> | Yes (n = 5)                                | <i>Rickettsia amblyommatis</i><br><i>Hepatozoon sp. A</i><br><i>Babesia sp. (Coco)</i><br><i>Theileria cervi</i><br><i>Ehrlichia chaffeensis</i><br><i>Ehrlichia sp. Panola Mountain</i><br><i>Ehrlichia ewingii</i><br><i>Rickettsia parkeri</i><br><i>Borrelia lonestari</i><br><i>Hepatozoon sp. A</i><br><i>Babesia sp.</i><br><br><i>Rickettsia rhiphicephali</i><br><br><i>Rickettsia sp. endosymbiont I. scap</i><br><i>Cryptoplasma sp.</i> |

|                                         |           |                                                                                                        |     |                                                                                                            |             |                                                                                                                                                                                                                                                                                                                                                                                                                           |
|-----------------------------------------|-----------|--------------------------------------------------------------------------------------------------------|-----|------------------------------------------------------------------------------------------------------------|-------------|---------------------------------------------------------------------------------------------------------------------------------------------------------------------------------------------------------------------------------------------------------------------------------------------------------------------------------------------------------------------------------------------------------------------------|
| Morningside Nature Center A             | Natural   | City of Gainesville Parks, Recreation, & Cultural Affairs                                              | 588 | <i>A. americanum</i> ,<br><br><i>D. variabilis</i> ,<br><br><i>I. scapularis</i>                           | Yes (n = 3) | <i>Rickettsia amblyommatis</i><br><i>Theileria cervi</i><br><i>Ehrlichia</i> sp. <i>Panola Mountain</i><br><i>Ehrlichia ewingii</i><br><i>Ehrlichia chaffeensis</i><br><i>Babesia</i> sp.<br><i>Hepatozoon</i> sp. A<br><br><i>Rickettsia rhiphicephali</i><br><i>Theileria cervi</i><br><br><i>Babesia odocoilei</i><br><i>Rickettsia</i> sp. <i>endosymbiont I. scap</i><br><i>Cryptoplasma (Alloccryptoplasma)</i> sp. |
| San Felasco Hammock Preserve State Park | Natural   | Florida Department of Environmental Protection, Division of Recreation and Parks, Florida Park Service | 147 | <i>A. americanum</i> ,<br><br><i>D. variabilis</i> ,<br><br><i>I. scapularis</i>                           | Yes (n = 1) | <i>Rickettsia amblyommatis</i><br><i>Theileria cervi</i><br><i>Ehrlichia chaffeensis</i><br><i>Ehrlichia</i> sp. <i>Panola Mountain</i><br><i>Hepatozoon</i> sp. A<br><br>None<br><br>None                                                                                                                                                                                                                                |
| Paynes Prairie Preserve State Park      | Natural   | Florida Department of Environmental Protection, Division of Recreation and Parks, Florida Park Service | 302 | <i>A. americanum</i> ,<br><br><i>D. variabilis</i> ,<br><br><i>I. scapularis</i>                           | Yes (n = 3) | <i>Rickettsia amblyommatis</i><br><i>Hepatozoon</i> sp. A<br><i>Theileria cervi</i><br><i>Ehrlichia chaffeensis</i><br><i>Borrelia lonestari</i><br><i>Theileria cervi</i><br><i>Ehrlichia</i> sp. <i>Panola Mountain</i><br><i>Ehrlichia ewingii</i><br><i>Babesia</i> sp. (Coco)<br><i>Babesia</i> sp.<br><br>None<br><br><i>Rickettsia</i> sp. <i>endosymbiont I. scap</i>                                             |
| Hatchet Creek Wildlife Management Area  | Natural   | St. Johns River Water Management District                                                              | 102 | <i>A. americanum</i> ,<br><br><i>A. maculatum</i> ,<br><br><i>I. affinis</i> ,<br><br><i>I. scapularis</i> | Yes (n = 6) | <i>Rickettsia amblyommatis</i><br><i>Theileria cervi</i><br><br><i>Rickettsia andeanae</i><br><br><i>Rickettsia</i> sp. <i>I. aff.</i><br><br><i>Rickettsia</i> sp. <i>endosymbiont I. scap</i><br><i>Babesia odocoilei</i><br><i>Cryptoplasma (Alloccryptoplasma)</i> sp.<br><i>Hepatozoon</i> sp. B                                                                                                                     |
| Reserve Park                            | Manicured | City of Gainesville                                                                                    | 2   | <i>A. americanum</i>                                                                                       | No          | <i>Theileria cervi</i>                                                                                                                                                                                                                                                                                                                                                                                                    |

|                                            |           |                                                                                                                                       |    |                                                                                  |             |                                                                                                                                                                                                                        |
|--------------------------------------------|-----------|---------------------------------------------------------------------------------------------------------------------------------------|----|----------------------------------------------------------------------------------|-------------|------------------------------------------------------------------------------------------------------------------------------------------------------------------------------------------------------------------------|
|                                            |           | Parks,<br>Recreation,<br>& Cultural<br>Affairs                                                                                        |    |                                                                                  |             |                                                                                                                                                                                                                        |
| University<br>Gardens                      | Manicured | The<br>University of<br>Florida                                                                                                       | 2  | <i>I. scapularis</i>                                                             | No          | <i>None</i>                                                                                                                                                                                                            |
| Hogtown Creek<br>Headwaters<br>Nature Park | Manicured | City of<br>Gainesville<br>Parks,<br>Recreation,<br>& Cultural<br>Affairs                                                              | 42 | <i>A. americanum</i> ,<br><br><i>A. maculatum</i>                                | Yes (n = 1) | <i>Rickettsia amblyommatis</i><br><i>Ehrlichia chaffeensis</i><br><i>Borrelia lonestari</i><br><i>Babesia</i> sp.<br><i>Theileria cervi</i><br><br><i>None</i>                                                         |
| Possum Creek<br>Park                       | Manicured | City of<br>Gainesville<br>Parks,<br>Recreation,<br>& Cultural<br>Affairs                                                              | 5  | <i>A. americanum</i>                                                             | No          | <i>Rickettsia amblyommatis</i>                                                                                                                                                                                         |
| Fred Cone Park                             | Manicured | City of<br>Gainesville<br>Parks,<br>Recreation,<br>& Cultural<br>Affairs                                                              | 15 | <i>A. americanum</i> ,<br><br><i>D. variabilis</i>                               |             | <i>Rickettsia amblyommatis</i><br><i>Babesia</i> sp.<br><i>Babesia</i> sp. (Coco)<br><br><i>None</i>                                                                                                                   |
| Green Acres<br>Park                        | Manicured | City of<br>Gainesville<br>Parks,<br>Recreation,<br>& Cultural<br>Affairs                                                              | 0  | NA                                                                               | No          | NA                                                                                                                                                                                                                     |
| Morningside<br>Nature Center B             | Manicured | City of<br>Gainesville<br>Parks,<br>Recreation,<br>& Cultural<br>Affairs                                                              | 45 | <i>A. americanum</i> ,<br><br><i>I. scapularis</i>                               | No          | <i>Rickettsia amblyommatis</i><br><i>Borrelia lonestari</i><br><i>Babesia</i> sp.<br><i>Theileria cervi</i><br><br><i>Rickettsia</i> sp. endosymbiont <i>I. scap</i><br><i>Cryptoplasma (Alloccryptoplasma)</i><br>sp. |
| Dudley Farm<br>Historic State<br>Park      | Manicured | Florida<br>Department<br>of<br>Environment<br>al<br>Protection,<br>Division of<br>Recreation<br>and Parks,<br>Florida Park<br>Service | 31 | <i>A. americanum</i> ,<br><br><i>I. scapularis</i> ,<br><br><i>D. variabilis</i> | No          | <i>Rickettsia amblyommatis</i><br><i>Babesia</i> sp.<br><i>Hepatozoon</i> sp. A<br><i>Borrelia lonestari</i><br><i>Babesia</i> sp. (Coco)<br><br><i>Babesia odocoilei</i><br><br><i>None</i>                           |
| Longleaf<br>Flatwoods<br>Reserve           | Manicured | St. Johns<br>River Water                                                                                                              | 17 | <i>A. americanum</i>                                                             | Yes (n = 2) | <i>Rickettsia amblyommatis</i><br><i>Rickettsia parkeri</i><br><i>Borrelia lonestari</i>                                                                                                                               |



|  |  |                         |  |  |  |                        |
|--|--|-------------------------|--|--|--|------------------------|
|  |  | Managemen<br>t District |  |  |  | <i>Theileria cervi</i> |
|--|--|-------------------------|--|--|--|------------------------|

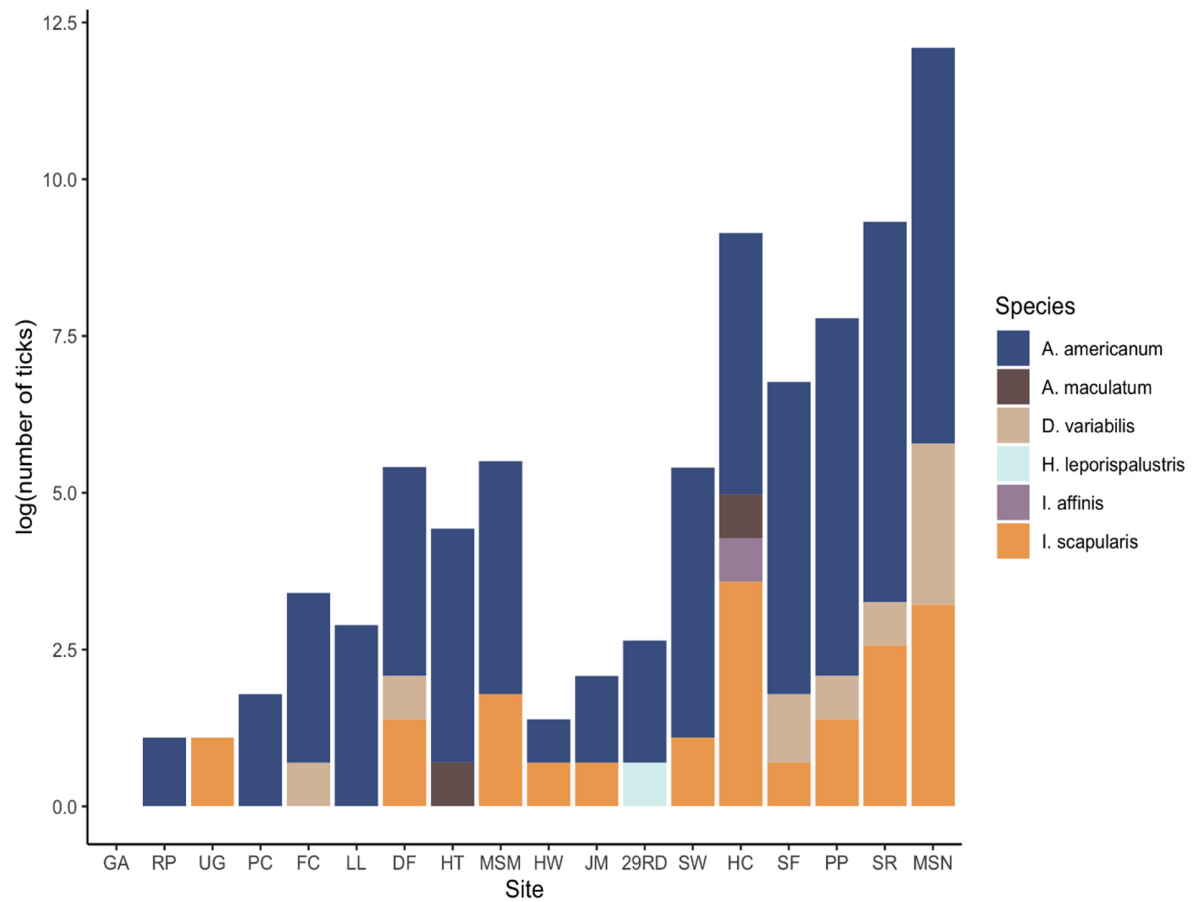

**Supplementary Figure S2.** Total tick abundance (log transformed) by species collected in across all 18 sampling sites. First 9 sites are designated as manicured, while the last 9 sites are designated as natural sites.

**Supplementary Table S3.** Total number of tick species collected per life stage from the first week of January 2021 to the last week of June 2021 across both environmental types. An asterisk \* indicates larval pools were collected. Total number of ticks does not include larval pool count.

| Tick species and life stage      | Natural     | Manicured  | Total              |
|----------------------------------|-------------|------------|--------------------|
| <i>A. americanum</i> adult       | 629         | 44         | <b>673</b>         |
| <i>A. americanum</i> nymph       | 940         | 102        | <b>1042</b>        |
| <i>A. americanum</i> larvae      | *(18 pools) | *(3 pools) | <b>*(21 pools)</b> |
| <i>A. maculatum</i> nymph        | 1           | 1          | <b>2</b>           |
| <i>D. variabilis</i> adult       | 16          | 2          | <b>18</b>          |
| <i>H. leporispalustris</i> nymph | 1           | 0          | <b>1</b>           |
| <i>I. affinis</i> adult          | 1           | 0          | <b>1</b>           |
| <i>I. scapularis</i> adult       | 79          | 10         | <b>89</b>          |
| Total                            | <b>1667</b> | <b>159</b> | <b>1826</b>        |

**Supplementary Table S4.** Published NCBI accession #s per each microorganism identified by PCR, n-PCR, or h-PCR. If the same microorganism was identified using different genes or in more than one tick species, separate NCBI accession #s were retrieved. The percent sequence identity to most closely related published species sequences are given only for reported genus level matches as species sequences matched 99% or higher to species in GenBank. \*Our *ompA* *Rickettsia* sp. sample from *I. affinis* was unable to be verified in NCBI blast due to inclusion of base pair shift which inserts stop codon in translated protein sequence.

| Tick species         | Microorganism                                        | Gene [NCBI Accession #]                                                     | % Identity to species in NCBI for genus matches.                                                                                                      |
|----------------------|------------------------------------------------------|-----------------------------------------------------------------------------|-------------------------------------------------------------------------------------------------------------------------------------------------------|
| <i>A. americanum</i> | <i>Babesia</i> sp.                                   | <i>18s</i> [OM865359]                                                       | 100% <i>Babesia</i> sp. NYT-435 [MW665118] & <i>Babesia</i> sp. H10 clone 3 [HQ264119]                                                                |
|                      | <i>Babesia</i> sp. (Coco)                            | <i>18s</i> [OM865360]                                                       | ---                                                                                                                                                   |
|                      | <i>Borrelia lonestari</i>                            | <i>flaB</i> [OM960690]                                                      | ---                                                                                                                                                   |
|                      | <i>Cytauxzoon felis</i>                              | <i>18s</i> [OM865361]                                                       | ---                                                                                                                                                   |
|                      | <i>Ehrlichia ewingii</i>                             | <i>groEL</i> [OM960692]                                                     | ---                                                                                                                                                   |
|                      | <i>Ehrlichia chaffeensis</i>                         | <i>groEL</i> [OM960693]                                                     | ---                                                                                                                                                   |
|                      | <i>Panola Mtn. Ehrlichia</i> sp.                     | <i>groEL</i> [OM960694];<br><i>gltA</i> [OM960695]                          | ---                                                                                                                                                   |
|                      | <i>Hepatozoon</i> sp. A                              | <i>18s</i> [OM865362]                                                       | 96.7% <i>Hepatozoon procyonis</i> [MF685396]                                                                                                          |
|                      | <i>Rickettsia amblyommatis</i>                       | <i>ompA</i> [OM960698]                                                      | ---                                                                                                                                                   |
|                      | <i>Rickettsia parkeri</i>                            | <i>PLA</i> [OM960702]                                                       | ---                                                                                                                                                   |
|                      | <i>Theileria cervi</i>                               | <i>18s</i> [OM865364]                                                       | ---                                                                                                                                                   |
| <i>A. maculatum</i>  | <i>Rickettsia andeanae</i>                           | <i>ompA</i> [OM960699];<br><i>gltA</i> [OM960696]                           | ---                                                                                                                                                   |
| <i>D. variabilis</i> | <i>Rickettsia rhiphicephali</i>                      | <i>ompA</i> [OM960701];<br><i>gltA</i> [OM960697];<br><i>PLA</i> [OM960703] | ---                                                                                                                                                   |
|                      | <i>Theileria cervi</i>                               | <i>18s</i> [OM865365]                                                       | ---                                                                                                                                                   |
| <i>I. affinis</i>    | <i>Rickettsia</i> sp.                                | <i>ompA</i> [*];<br><i>gltA</i> [ON081007]                                  | 99% <i>Rickettsia</i> sp. clone Belizelaff [KU001175] <i>ompA</i> & 99.2% uncultured <i>Rickettsia</i> sp. clone NP9 <i>gltA</i> [MT441702]           |
| <i>I. scapularis</i> | <i>Babesia odocoeli</i>                              | <i>18s</i> [OM865358]                                                       | ---                                                                                                                                                   |
|                      | <i>Cryptoplasma</i> ( <i>Alloccryptoplasma</i> ) sp. | <i>groEL</i> [OM960691];<br><i>16s</i> [OM884475]                           | 97.1% <i>Candidatus Cryptoplasma californiense</i> [KP276601] <i>ompA</i> & 100% <i>Candidatus Cryptoplasma californiense</i> [KP276585] <i>16s</i> . |

|  |                                    |                        |                                           |
|--|------------------------------------|------------------------|-------------------------------------------|
|  | <i>Hepatozoon</i> sp. B            | <i>18s</i> [OM865363]  | 96.9% <i>Hepatozoon</i> sp.<br>[MZ351069] |
|  | <i>Rickettsia</i> sp. endosymbiont | <i>ompA</i> [OM960700] | ---                                       |

*Amblyomma americanum* (adults and nymphs)

| <i>Babesia</i> sp. | <i>Babesia</i> sp.<br>Coco | <i>Borrelia</i><br><i>lonestari</i> | <i>Ehrlichia</i> sp.<br>PanolaMtn | <i>Ehrlichia</i><br><i>chaffeensis</i> | <i>Ehrlichia</i> <i>ewingii</i> | <i>Hepatozoon</i> sp. | <i>Rickettsia</i><br><i>amblyommatis</i> | <i>Rickettsia</i><br><i>parkeri</i> | <i>Theileria</i> <i>cervi</i> |                                          |
|--------------------|----------------------------|-------------------------------------|-----------------------------------|----------------------------------------|---------------------------------|-----------------------|------------------------------------------|-------------------------------------|-------------------------------|------------------------------------------|
| -                  | 0                          | 0                                   | 0                                 | 0                                      | 0                               | 0                     | 8                                        | 0                                   | 0                             | <i>Babesia</i> sp.                       |
|                    | -                          | 0                                   | 0                                 | 0                                      | 0                               | 0                     | 7                                        | 0                                   | 0                             | <i>Babesia</i> sp.<br>Coco               |
|                    |                            | -                                   | 0                                 | 0                                      | 0                               | 0                     | 4                                        | 0                                   | 0                             | <i>Borrelia</i><br><i>lonestari</i>      |
|                    |                            |                                     | -                                 | 0                                      | 1                               | 0                     | 2                                        | 0                                   | 0                             | <i>Ehrlichia</i> sp.<br>PanolaMtn        |
|                    |                            |                                     |                                   | -                                      | 0                               | 0                     | 2                                        | 0                                   | 1                             | <i>Ehrlichia</i><br><i>chaffeensis</i>   |
|                    |                            |                                     |                                   |                                        | -                               | 0                     | 5                                        | 0                                   | 0                             | <i>Ehrlichia</i> <i>ewingii</i>          |
|                    |                            |                                     |                                   |                                        |                                 | -                     | 12                                       | 0                                   | 0                             | <i>Hepatozoon</i> sp.                    |
|                    |                            |                                     |                                   |                                        |                                 |                       | -                                        | 2                                   | 27                            | <i>Rickettsia</i><br><i>amblyommatis</i> |
|                    |                            |                                     |                                   |                                        |                                 |                       |                                          | -                                   | 0                             | <i>Rickettsia</i><br><i>parkeri</i>      |
|                    |                            |                                     |                                   |                                        |                                 |                       |                                          |                                     | -                             | <i>Theileria</i> <i>cervi</i>            |

*Ixodes scapularis* (adults)

| <i>Babesia</i><br><i>odocoilei</i> | <i>Cryptoplasma</i><br>sp. | <i>Hepatozoon</i><br>sp. | <i>Rickettsia</i> sp. |                                    |
|------------------------------------|----------------------------|--------------------------|-----------------------|------------------------------------|
| -                                  | 1                          | 0                        | 2                     | <i>Babesia</i><br><i>odocoilei</i> |
|                                    | -                          | 0                        | 2                     | <i>Cryptoplasma</i><br>sp.         |
|                                    |                            | -                        | 1                     | <i>Hepatozoon</i><br>sp.           |
|                                    |                            |                          | -                     | <i>Rickettsia</i> sp.              |

**Supplementary Figure S3.** Matrices of bacterial co-infections in individual *Amblyomma americanum* and *Ixodes scapularis* ticks collected in Alachua County, Florida, USA from January to June 2021.

**Supplementary Table S5.** Model results evaluating the influence of landscape variables on tick abundance. Best-fitting negative binomial GLMs (i.e., lowest AIC and all models with 2  $\Delta$ AIC value < 2) for (a) *A. americanum* and (b) *I. scapularis* abundance. The  $\Delta$ AIC for the null model is also indicated. \*\*\* indicates  $p < 0.01$ , \*\* indicates  $p < 0.05$ , and \* indicates  $p < 0.1$ . The standard error for each estimate is indicated in parentheses. The development gradient represents the developed to natural landcover gradient using 500m buffers for each site. Habitat type compares manicured sites to natural sites. Results are presented for models including all sites (full) and models excluding outlier sites (screened). The ‘screened’ dataset for *A. americanum* had two outlier sites removed, and the ‘screened’ dataset for *I. scapularis* has one outlier site removed.

| Species                  | Dataset  | Intercept           | Habitat Type        | Development Gradient | AIC   | delta AIC | Pseudo R <sup>2</sup> |
|--------------------------|----------|---------------------|---------------------|----------------------|-------|-----------|-----------------------|
| (a) <i>A. americanum</i> |          |                     |                     |                      |       |           |                       |
|                          | full     | 2.461***<br>(0.377) | 1.238***<br>(0.525) | 0.945***<br>(0.165)  | 170.4 | 0         | 62.1                  |
|                          |          | 3.144***<br>(0.305) |                     | 1.129***<br>(0.182)  | 172.4 | 2         | 53.3                  |
|                          |          | 4.556***<br>(0.405) |                     |                      | 186.4 | 16        | 0                     |
|                          | screened | 1.868***<br>(0.315) | 1.240***<br>(0.413) | 1.003***<br>(0.131)  | 134.6 | 0         | 80.4                  |
|                          |          | 4.355***<br>(0.439) |                     |                      | 158.4 | 23.8      | 0                     |
| (b) <i>I. scapularis</i> |          |                     |                     |                      |       |           |                       |
|                          | full     | -0.169<br>(0.531)   | 1.371**<br>(0.666)  | 0.620***<br>(0.216)  | 83.6  | 0         | 49.0                  |
|                          |          | 0.645<br>(0.410)    |                     | 0.752***<br>(0.242)  | 84.8  | 1.2       | 37.1                  |
|                          |          | 1.598***<br>(0.438) |                     |                      | 90.7  | 7.1       | 0                     |
|                          | screened | -0.765<br>(0.628)   | 1.721**<br>(0.716)  | 0.825***<br>(0.248)  | 76.0  | 0         | 58.5                  |
|                          |          | 1.633***<br>(0.469) |                     |                      | 85.5  | 9.5       | 0                     |

**Supplementary Table S6.** “Scale of effect” on tick abundance. Generalized linear model results showing the response of abundance for (a) *Amblyomma americanum* and (b) *Ixodes scapularis* to the effects of the development gradient across all spatial scales.

| Model (Spatial Scale)           | Intercept | Estimate | logLik | delta AICc |
|---------------------------------|-----------|----------|--------|------------|
| (a) <i>Amblyomma americanum</i> |           |          |        |            |
| PC1 (500m)                      | 3.525     | 0.829    | -1017  | 0          |
| PC1 (250m)                      | 3.884     | -0.844   | -1099  | 164        |
| PC1 (1km)                       | 4.062     | 0.429    | -1374  | 714        |
| PC1 (2km)                       | 4.244     | 0.306    | -1489  | 945        |
| PC1 (3km)                       | 4.416     | 0.175    | -1683  | 1333       |
| PC1 (4km)                       | 4.474     | 0.119    | -1723  | 1436       |
| (b) <i>Ixodes scapularis</i>    |           |          |        |            |
| PC1 (500m)                      | 0.487     | 0.874    | -80    | 0          |
| PC1 (1km)                       | 0.773     | 0.603    | -87    | 12         |
| PC1 (2km)                       | 0.963     | 0.477    | -89    | 17         |
| PC1 (250m)                      | 1.019     | -0.770   | -91    | 21         |
| PC1 (4km)                       | 1.246     | 0.305    | -103   | 44         |
| PC1 (3km)                       | 1.224     | 0.331    | -103   | 46         |



**Supplementary Table S7.** Model results evaluating the influence of landscape variables on infected ticks and pathogen richness. Best-fitting negative binomial GLMs (i.e., lowest AIC and all models with 2  $\Delta$ AIC value < 2) for (a) the presence of infected tick, (b) the abundance of infected ticks, and (c) pathogen richness. The  $\Delta$ AIC for the null model is also indicated. \*\*\* indicates  $p < 0.01$ , \*\* indicates  $p < 0.05$ , and \* indicates  $p < 0.1$ . The standard error for each estimate is indicated in parentheses. The development gradient represents a developed to natural landcover gradient using 500m buffers for each site. Habitat type compares manicured sites to natural sites.

| Response Variable               | Intercept           | Habitat Type        | Development Gradient | AIC  | delta AIC | Pseudo R <sup>2</sup> |
|---------------------------------|---------------------|---------------------|----------------------|------|-----------|-----------------------|
| (a) presence of infected tick   |                     |                     |                      |      |           |                       |
|                                 | -1.591<br>(1.198)   | 3.835<br>(2.702)    | 1.690*<br>(0.971)    | 17.1 | 0         | 54.9                  |
|                                 | 0.223<br>(0.474)    |                     |                      | 26.7 | 7.2       | 0                     |
| (b) abundance of infected ticks |                     |                     |                      |      |           |                       |
|                                 | -1.187*<br>(0.625)  | 1.945***<br>(0.688) | 0.608***<br>(0.211)  | 64.5 | 0         | 61.0                  |
|                                 | 0.916**<br>(0.401)  |                     |                      | 75.5 | 11        | 0                     |
| (c) pathogen richness           |                     |                     |                      |      |           |                       |
|                                 | -1.082**<br>(0.550) | 1.238**<br>(0.600)  | 0.493**<br>(0.197)   | 52.0 | 0         | 54.4                  |
|                                 | 0.288<br>(0.327)    |                     |                      | 61.3 | 9.3       | 0                     |
